# Supplementary material for: ε2-Phages Are Naturally Bred and Have a Vastly Improved Host Range in Staphylococcus aureus over Wild Type Phages
Source: PubMed Central journal article supplement (PMC8065394; doi:10.3390/ph14040325), 2021-04-02
Supplement: pharmaceuticals-14-00325-s001.pdf [file pharmaceuticals-14-00325-s001.pdf]

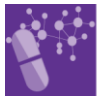

Supplementary Materials

Table S1. Comparison of clonal complexes in *S. aureus* in this study with literature sources.

| Reference               | This study                  |                    | Kanjilal et al., 2018       | Arias et al., 2017               | Rasmussen et al., 2013        | Rasmussen et al., 2013                            | Lüdicke et al., 2010                     |
|-------------------------|-----------------------------|--------------------|-----------------------------|----------------------------------|-------------------------------|---------------------------------------------------|------------------------------------------|
| Country of Isolation    | Germany                     |                    | USA (Boston)                | Latin America, Various Countries | Sweden                        | Sweden                                            | Germany                                  |
| Total Number of Strains | 110                         |                    | 180                         | 121                              | 88                            | 134                                               | 119                                      |
| Source, Pathogenicity   | Human Infections            |                    | Hospital Clinical Specimens | Bloodstream MRSA                 | Invasive <i>S.aureus</i> Only | All <i>S.aureus</i> , Non-Invasive and Infections | Infections of Bones, Prosthetic Implants |
| Conal Complex           | # of Isolates in This Study | % of Total Strains | % of Strains                |                                  |                               |                                                   |                                          |
| CC45                    | 19                          | 17%                | 4%                          |                                  | 25%                           | 26%                                               | 18%                                      |
| CC30                    | 16                          | 15%                | 4%                          | 9%                               | 15%                           | 23%                                               | 13%                                      |
| CC8                     | 15                          | 14%                | 24%                         | 27%                              | 8%                            | 7%                                                | 19%                                      |
| CC22                    | 9                           | 8%                 |                             | 2%                               |                               |                                                   | 3%                                       |
| CC5                     | 8                           | 7%                 | 31%                         | 35%                              | 12%                           | 8%                                                | 7%                                       |
| CC398                   | 7                           | 6%                 |                             | 1%                               |                               |                                                   |                                          |
| CC25                    | 6                           | 5%                 |                             |                                  | 9%                            | 8%                                                | 7%                                       |
| CC101                   | 3                           | 3%                 |                             |                                  |                               |                                                   | 8%                                       |
| CC12                    | 3                           | 3%                 |                             |                                  |                               |                                                   | 5%                                       |
| CC15                    | 3                           | 3%                 | 6%                          |                                  | 14%                           | 11%                                               | 6%                                       |
| CC80                    | 2                           | 2%                 |                             |                                  |                               |                                                   | 1%                                       |
| CC9                     | 2                           | 2%                 |                             |                                  |                               |                                                   | 2%                                       |
| CC88                    | 2                           | 2%                 |                             | 2%                               |                               |                                                   |                                          |
| CC6                     | 2                           | 2%                 |                             |                                  |                               |                                                   |                                          |
| CC239                   | 2                           | 2%                 |                             | 4%                               |                               |                                                   |                                          |
| CC1                     | 2                           | 2%                 | 8%                          | 2%                               |                               |                                                   |                                          |
| CC96                    | 1                           | 1%                 |                             |                                  |                               |                                                   | 1%                                       |
| CC59                    | 1                           | 1%                 |                             |                                  |                               |                                                   | 1%                                       |
| CC121                   | 1                           | 1%                 |                             |                                  |                               |                                                   | 3%                                       |
| CC7                     | 1                           | 1%                 |                             |                                  |                               |                                                   | 3%                                       |
| CC97                    | 1                           | 1%                 |                             | 1%                               |                               |                                                   | 1%                                       |
| CC772                   | 1                           | 1%                 |                             |                                  |                               |                                                   |                                          |
| CC60                    | 1                           | 1%                 |                             |                                  |                               |                                                   |                                          |
| CC395                   | 1                           | 1%                 |                             |                                  |                               |                                                   |                                          |
| CC49                    | 1                           | 1%                 |                             |                                  |                               |                                                   | 2%                                       |

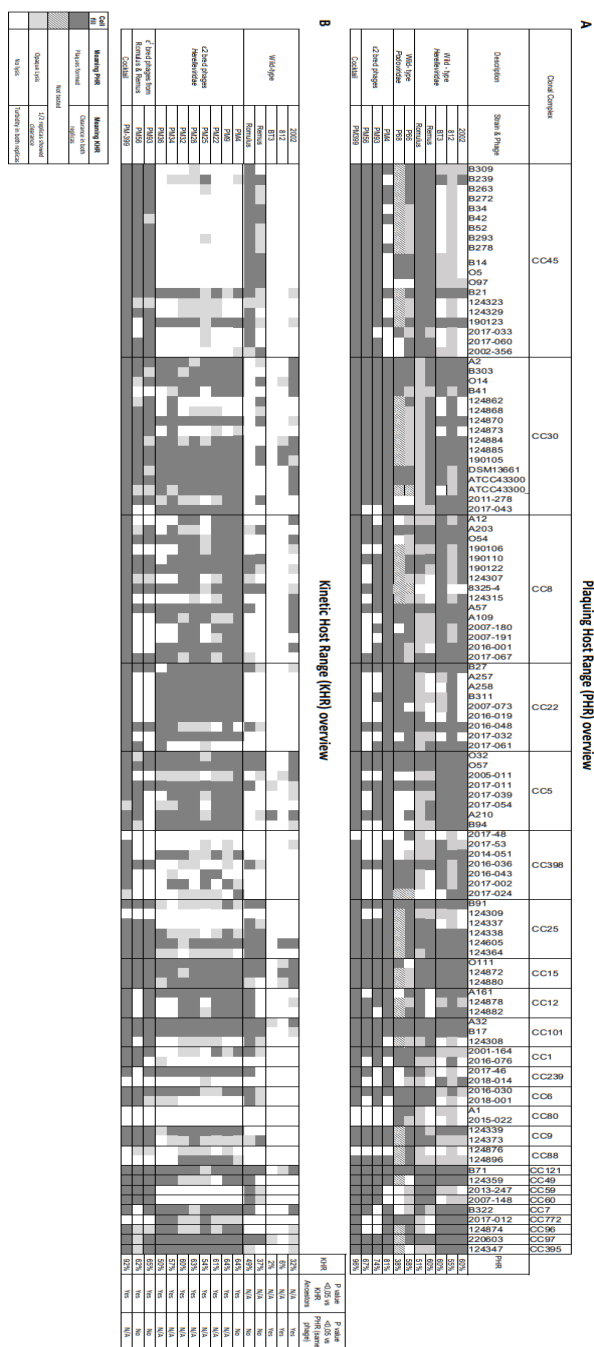

**Figure S1.** (A) Overview of the full plaquing host range of the ancestor phages. Each combination of phage and bacteria is represented by a square in different colors: White refers to no signs of lysis, light grey refers to opaque lysis and dark grey refers to plaque formation. (B) Kinetic host range overview of all phages described in the study. Each phage was tested twice against every bacterium in the panel of 110 *S. aureus* strains. Results are represented by a square in different colors: White indicates no clearance of bacteria after 24 h in any of the duplicates, light grey indicates clearance in one of the duplicates and dark grey indicates clearance in both duplicates tested. Striped line stands for not tested. In both parts of the figure, the phages tested are depicted on the left, grouped by originals or the experiment they were derived from. The bacterial strains are depicted in the top row, for both figures, grouped by clonal complex, with the MRSA/MSSA status shown in the second row of part B. Host range percentage is seen in the last columns of the table referring to each different phage. The last two columns refer to the statistical analysis, where KHR of bred phages was compared to the ancestors, and PHR and PHR values were compared between each phage, calculated by one-way ANOVA.

**Table S2.** Resistance rate of *S. aureus* *S. aureus* ATCC43300 (CC30/ST39-MRSA-II) in broth measured against different phages. LOD: limit of detection (1 cell in 10<sup>11</sup>).

| Replica Phage | Replica 1 | Replica 2 | Replica 3 |
|---------------|-----------|-----------|-----------|
| PM4           | <LOD      | <LOD      | N/A       |
| PM93          | <LOD      | <LOD      | N/A       |
| PM-399        | <LOD      | <LOD      | <LOD      |

**Table S3.** Mutational changes between PM56 and Romulus (JX846613.1).

| Locus Tag | Module                        | Annotation                               | Mutation     | Start   | End     | Romulus to PM56 DNA | Romulus to PM56 Amino acid |
|-----------|-------------------------------|------------------------------------------|--------------|---------|---------|---------------------|----------------------------|
| Reg       | Unclear                       | regulatory                               | deletion     | 7512    | 7521    | T to -              | N/A                        |
| 018       | Structural                    | major capsid protein                     | single point | 13,991  | 13,991  | T to C              | F25S                       |
| 046       | Structural                    | structural protein                       | single point | 46,859  | 46,859  | G to T              | D300Y                      |
| 046       | Structural                    | structural protein                       | single point | 47,513  | 47,513  | G to A              | E518K                      |
| 081       | Replication and transcription | intron-encoded endonuclease pentapeptide | insertion    | 78,909  | 78,911  | TAT to TA-TAAT      | N insertion after Y241     |
| 117       | Unclear                       | repeat-containing protein                | single point | 97,750  | 97,750  | G to A              | M180I                      |
| 161       | Unclear                       | hypothetical protein                     | single point | 114,767 | 114,767 | A to C              | N219K                      |
| 187       | Unclear                       | hypothetical protein                     | insertion    | 130,309 | 130,311 | ATT to AT-TATT      | I insertion after I16      |

**Table S4.** Mutational changes between PM93 and Remus (JX846612.1).

| Locus Tag | Module                        | Annotation                             | Mutation     | Start | End   | Remus to PM93 DNA | Remus to PM93 Amino acid |
|-----------|-------------------------------|----------------------------------------|--------------|-------|-------|-------------------|--------------------------|
| 046       | Structural                    | structural protein                     | single point | 46859 | 46859 | G to T            | D383Y                    |
| 046       | Structural                    | structural protein                     | single point | 47819 | 47819 | C to A            | Q703K                    |
| 062       | Replication and transcription | hypothetical protein                   | single point | 61247 | 61247 | G to T            | V44L                     |
| 117       | Unclear                       | pentapeptide repeat-containing protein | single point | 97692 | 97692 | G to T            | G161V                    |
